# Supplementary material for: Effective liquid phase hydrodechlorination of diclofenac catalysed by Pd/CeO2
Source: Royal Society of Chemistry journal article supplement (doi:10.1039/c4ra16674d), 2015-01-01
Supplement: c4ra16674d1.pdf [file c4ra16674d1.pdf]

**Electronic supplementary information**

for

**Effective liquid phase hydrodechlorination of diclofenac catalysed by Pd/CeO<sub>2</sub>**

Ke Wu, Xiaojun Qian, Liangyan Chen\*, Haiqin Wan, Zhaoyi Xu, Shourong Zheng\*,

Dongqiang Zhu

*State Key Laboratory of Pollution Control and Resource Reuse, Jiangsu Key*

*Laboratory of Vehicle Emissions Control, School of the Environment, Nanjing*

*University, Nanjing 210093, China*

\*Corresponding author. Tel: +86-25-89680367; Fax: +86-25-89680367.

*E-mail:* [chenly@nju.edu.cn](mailto:chenly@nju.edu.cn) (L. Chen)

Tel: +86-25-89680373; Fax: +86-25-89680596.

*E-mail:* [srzheng@nju.edu.cn](mailto:srzheng@nju.edu.cn) (S. Zheng)

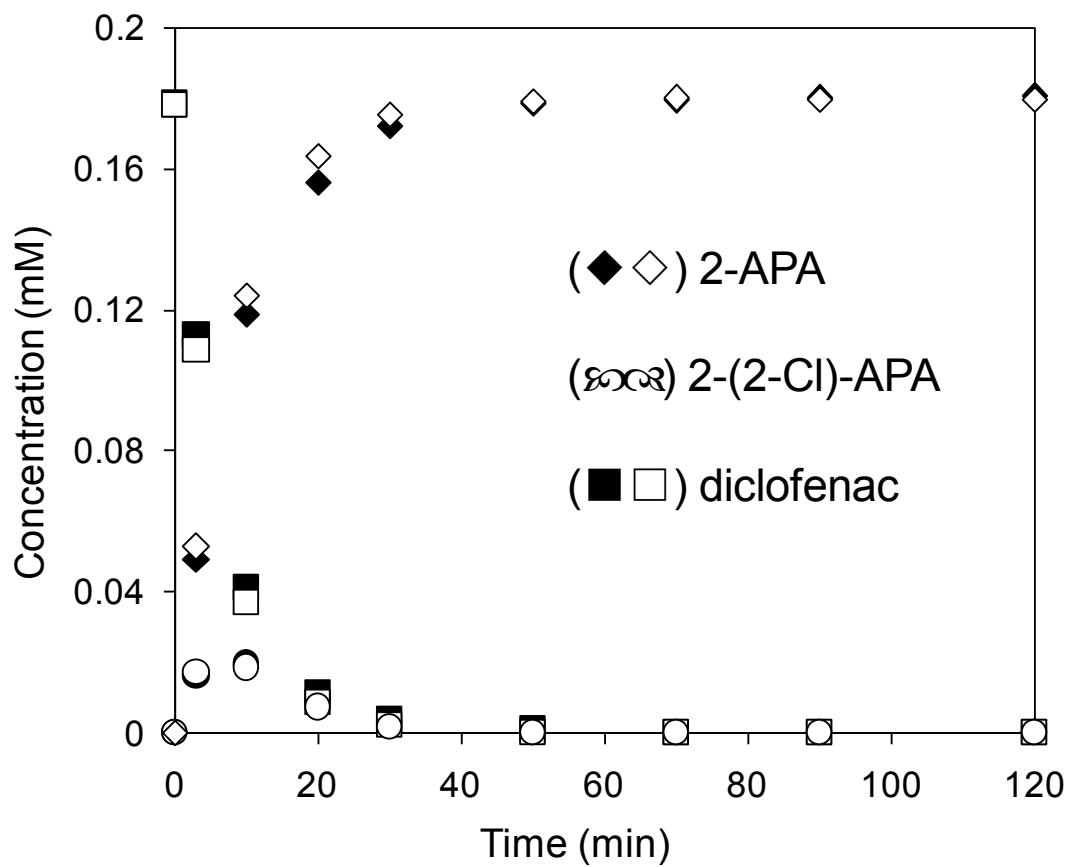

**Figure 1S** Liquid phase catalytic hydrodechlorination of diclofenac on *dp*-Pd(1.7)/CeO<sub>2</sub>. Solid and open symbols represent two separate runs. Reaction conditions: initial pH 9.0. Catalyst dosage: 0.10 g l<sup>-1</sup>.

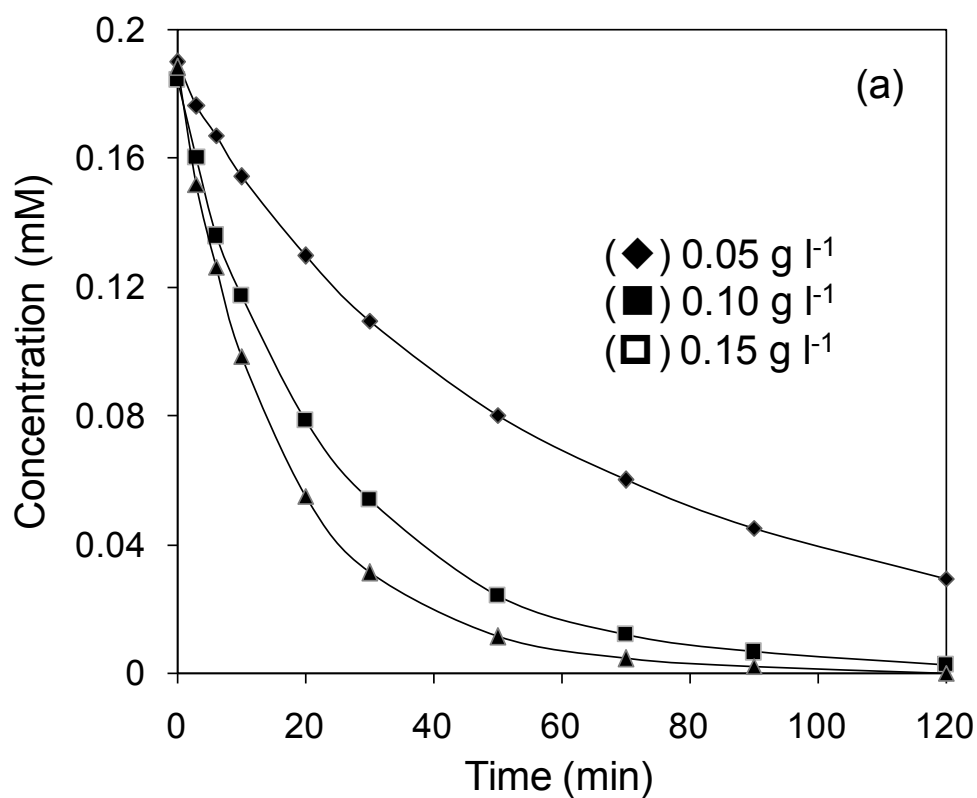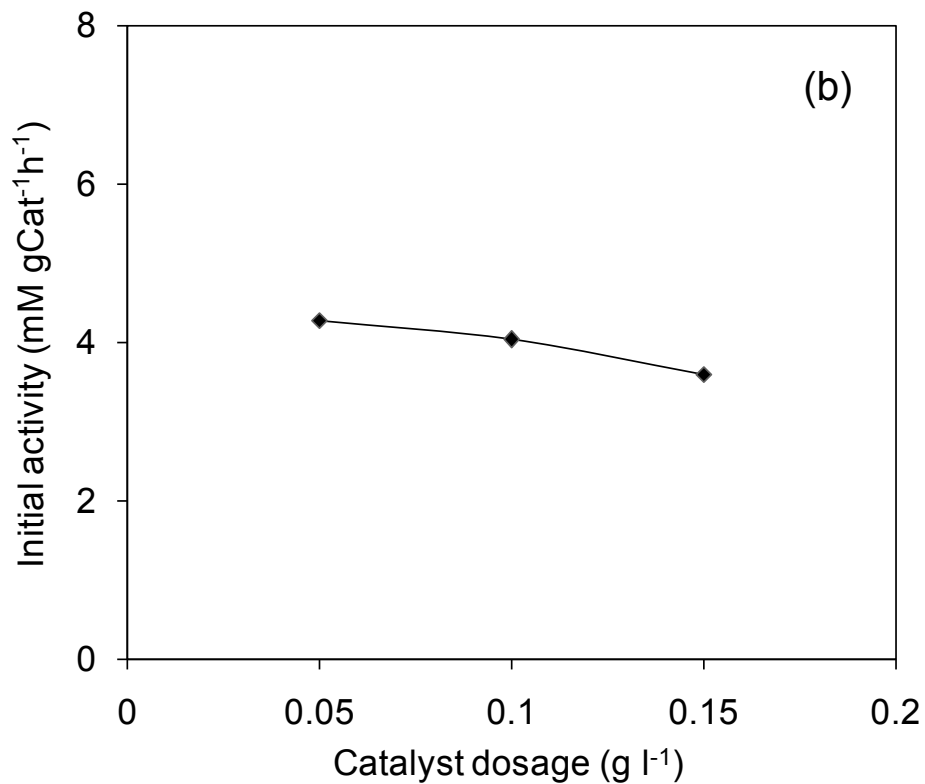

**Figure 2S** Catalytic hydrodechlorination of diclofenac over *dp*-Pd(1.7)/CeO<sub>2</sub> (a) with varied catalyst dosages, and (b) influence of catalyst dosage on catalyst dosage normalized initial catalytic activity.

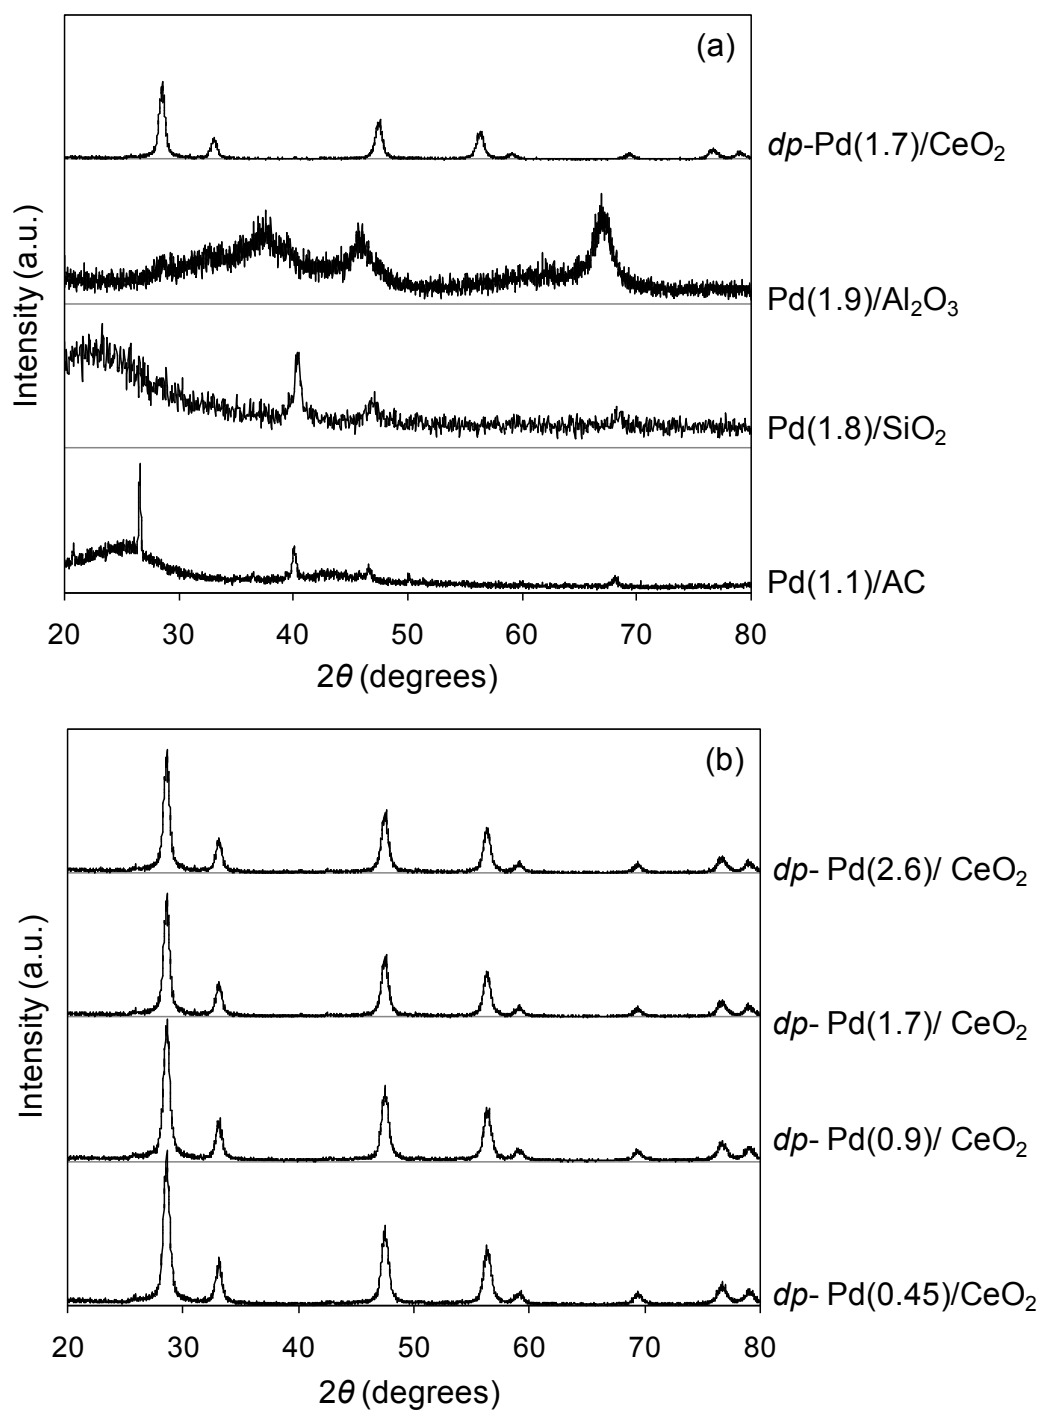

**Figure 3S** XRD patterns of Pd catalysts.

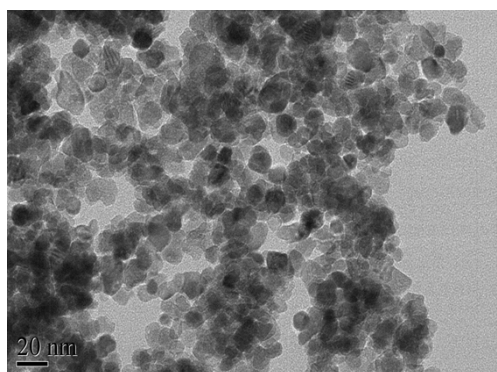

*dp*-Pd(0.45)/CeO<sub>2</sub>

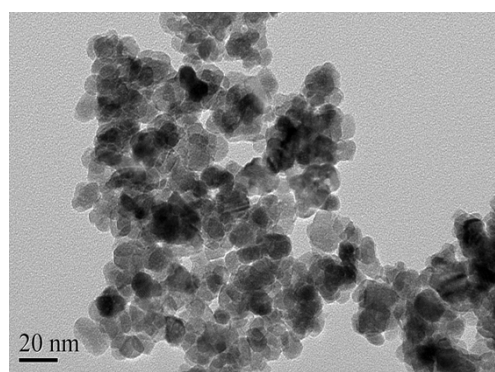

*dp*-Pd(0.6)/CeO<sub>2</sub>

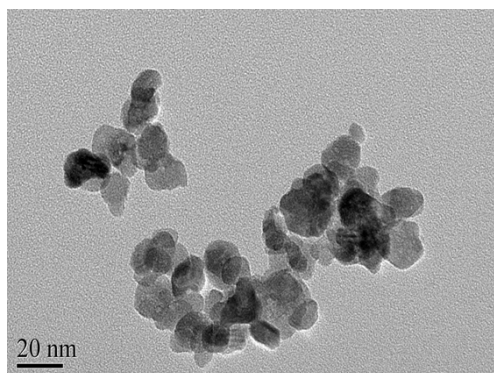

*dp*-Pd(1.7)/CeO<sub>2</sub>

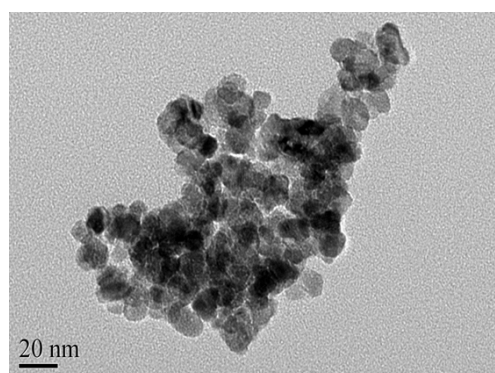

*dp*-Pd(2.6)/CeO<sub>2</sub>

**Figure 4S** The TEM images of Pd catalysts supported on CeO<sub>2</sub>.

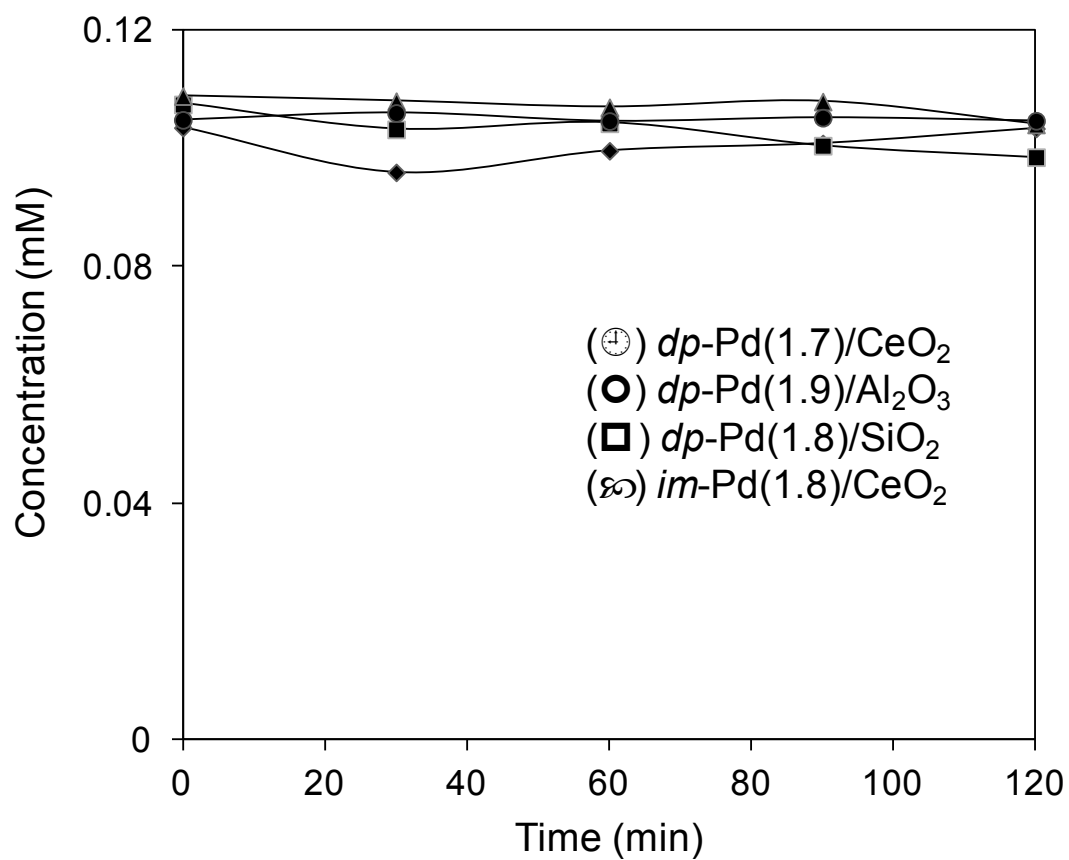

**Figure 5S** Catalytic HDC of 2-APA over Pd catalysts supported on AC, Al<sub>2</sub>O<sub>3</sub> and CeO<sub>2</sub>. Reaction conditions: pH 9.0. Catalyst dosage: 0.10 g l<sup>-1</sup>.

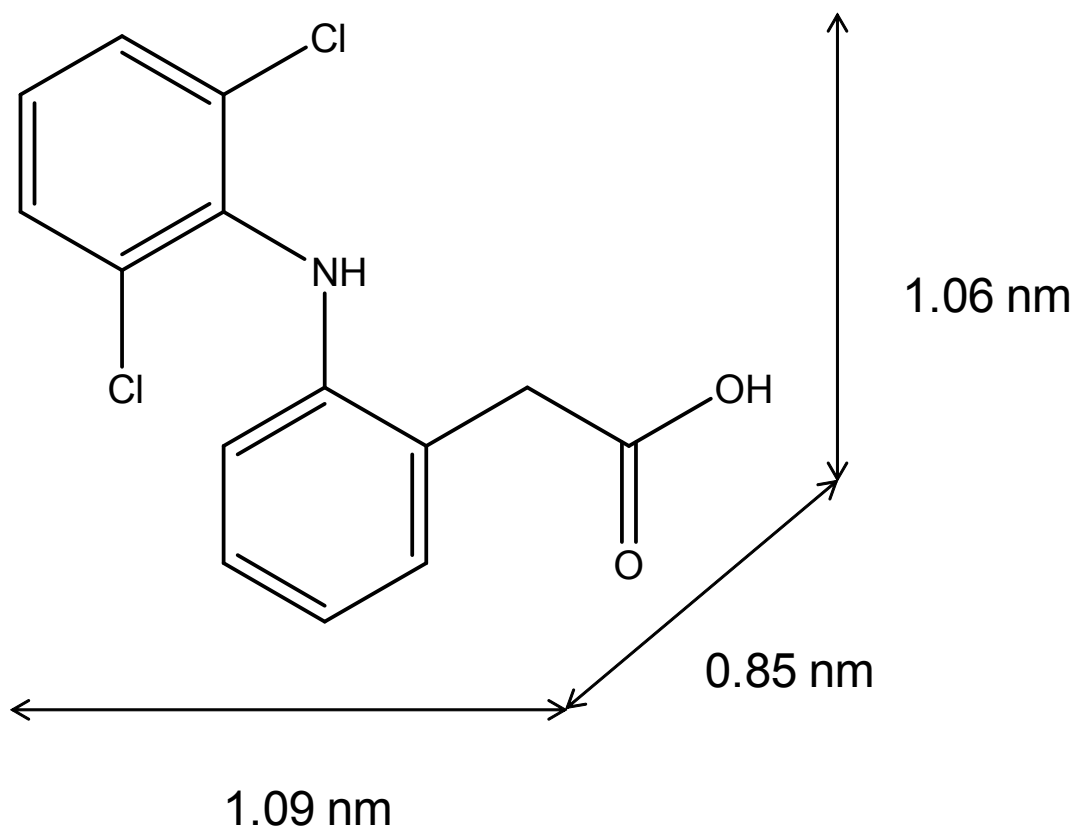

**Figure 6S** Molecular structure and estimated molecular size of diclofenac using Chem3D Program.
